# Supplementary material for: CAMSAPs and nucleation-promoting factors control microtubule release from γ-TuRC
Source: PubMed Central journal article supplement (PMC10940162; doi:10.1038/s41556-024-01366-2), 2024-02-29

# Source data extended data figure 1

Extended data Fig. 1b (uncropped agarose gel)

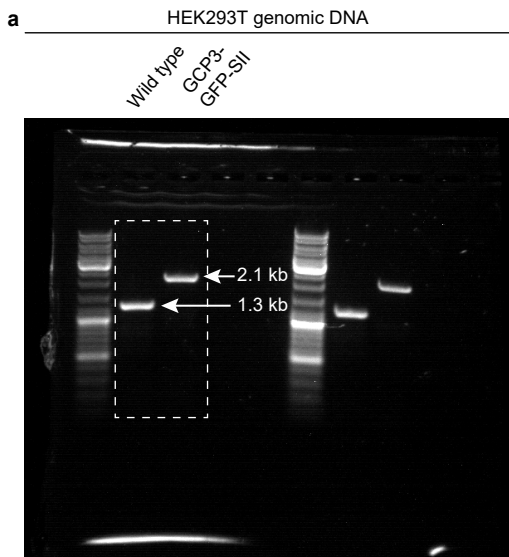

Extended data Fig. 1d (uncropped western blots)

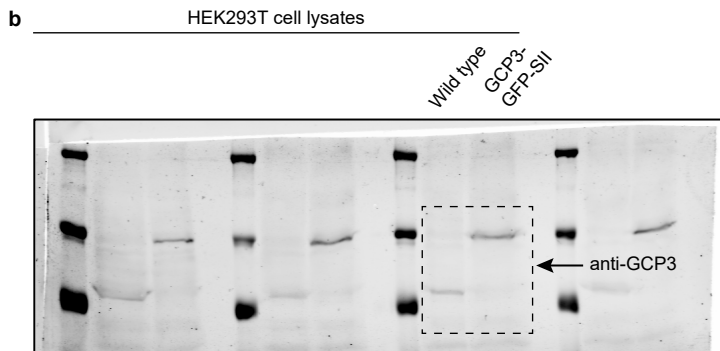

Extended data Fig. 1f (uncropped western blots)

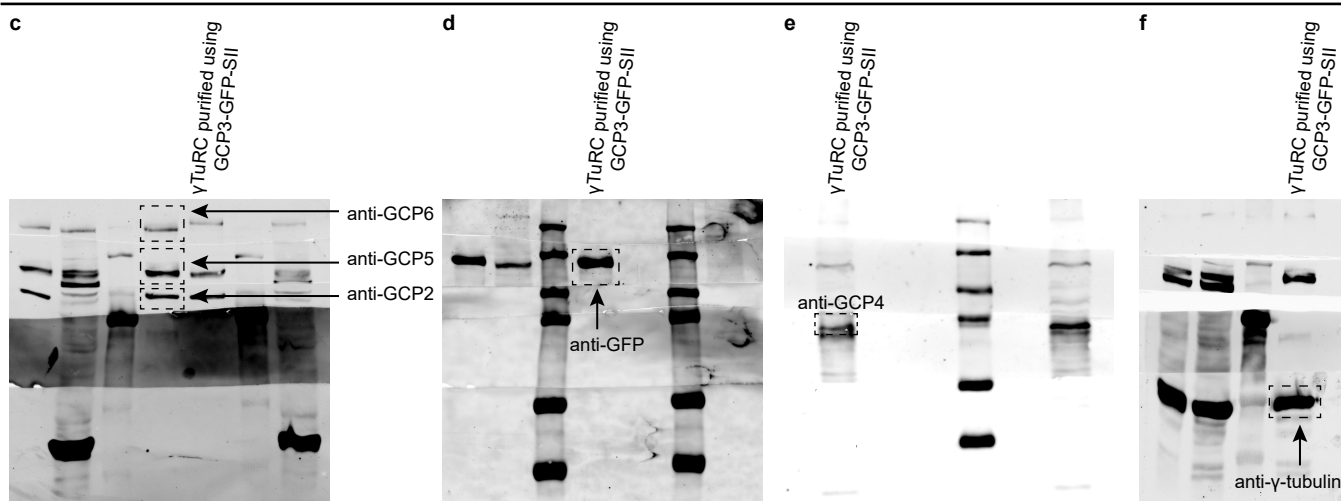

Extended data Fig. 1h (uncropped western blots)

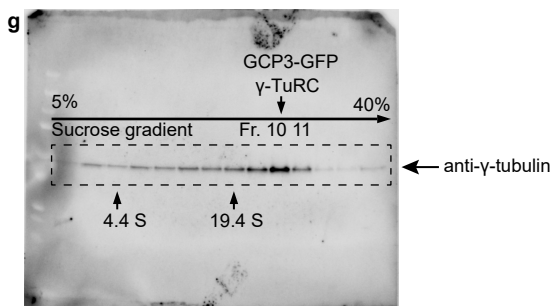

Extended data Fig. 1h (uncropped Coomassie-stained gels)

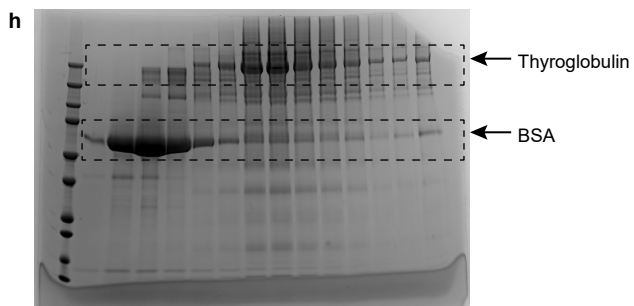

Supplement: 41556_2024_1366_MOESM16_ESM.pdf [file 41556_2024_1366_MOESM16_ESM.pdf]
