# Supplementary material for: CAMSAPs and nucleation-promoting factors control microtubule release from γ-TuRC
Source: PubMed Central journal article supplement (PMC10940162; doi:10.1038/s41556-024-01366-2), 2024-02-29

# Source data extended data figure 2

Extended data Fig. 2b (uncropped Coomassie-stained gels)

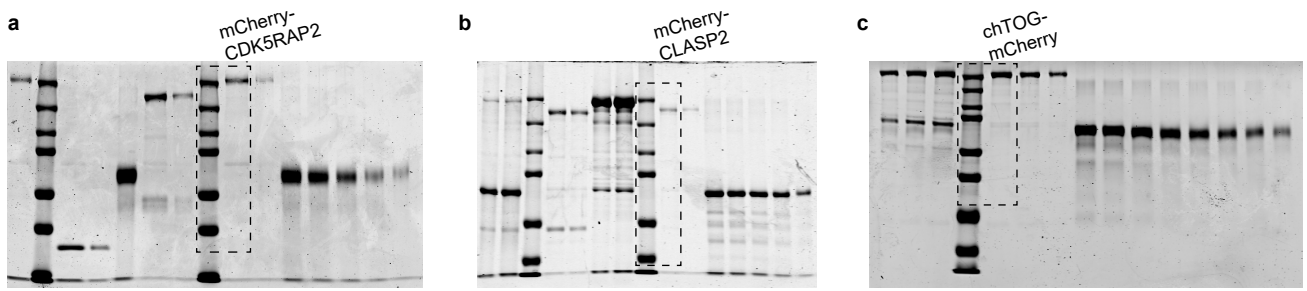

Supplement: 41556_2024_1366_MOESM17_ESM.pdf [file 41556_2024_1366_MOESM17_ESM.pdf]
